# Supplementary material
Source: PubMed Central journal article supplement (PMC7144157)
Supplement: ao0c00111_si_001.pdf [file ao0c00111_si_001.pdf]

## Supporting Information

### Developing biodegradable nanoparticles loaded with mometasone furoate for potential nasal drug delivery

Jumana **Far**<sup>1</sup>, Muhammad **Abdel-Haq**<sup>1</sup>, Maayan **Gruber**<sup>2,3</sup>, Aiman **Abu Ammar**<sup>1,\*</sup>

<sup>1</sup> Department of Pharmaceutical Engineering, Azrieli College of Engineering, Jerusalem 9103501, Israel

<sup>2</sup> Department of Otolaryngology-Head and Neck Surgery, Galilee Medical Center, Nahariya 2210001, Israel

<sup>3</sup> Faculty of Medicine in the Galilee, Bar-Ilan University, Safed 1311502, Israel

\* Corresponding author: Abu Ammar, Aiman (aimanab@jce.ac.il), Department of Pharmaceutical Engineering, Azrieli College of Engineering Jerusalem, 26 Yaakov Shreibom Street, Ramat Beit Hakerem, Jerusalem 9103501, Israel. Tel:+972-77-8871641

## Contents:

**Figure S1.** Calibration curve of MF in methanol.

**Figure S2.** Calibration curves of MF in 1% SDS PBS solution of pH 6.4 (A) and pH 7.4 (B).

**Figure S3.** MF release from PLGA NPs after freeze-drying using 8% (w/v) sucrose at pH 7.4 fitted to kinetic models. (A) Korsmeyer-Peppas; (B) Higuchi; (C) Zero order; and (D) First order model.

**Figure S4.** MF release from PLGA NPs after freeze-drying using 8% (w/v) sucrose at pH 6.4 fitted to kinetic models. (A) Korsmeyer-Peppas; (B) Higuchi; (C) Zero order; and (D) First order model.

**Figure S5.** MF release from PLGA NPs after freeze-drying using 8% (w/v) mannitol at pH 7.4 fitted to kinetic models. (A) Korsmeyer-Peppas; (B) Higuchi; (C) Zero order; and (D) First order model.

**Figure S6.** MF release from PLGA NPs after freeze-drying using 8% (w/v) mannitol at pH 6.4 fitted to kinetic models. (A) Korsmeyer-Peppas; (B) Higuchi; (C) Zero order; and (D) First order model.

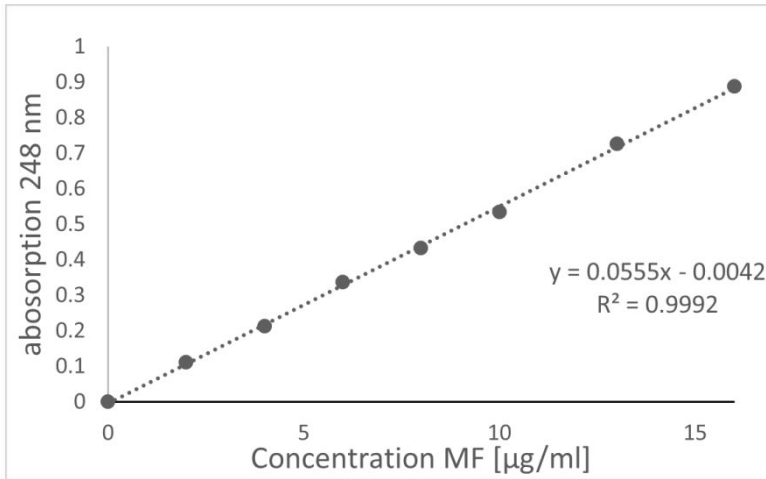

**Figure S1.** Calibration curve of MF in methanol.

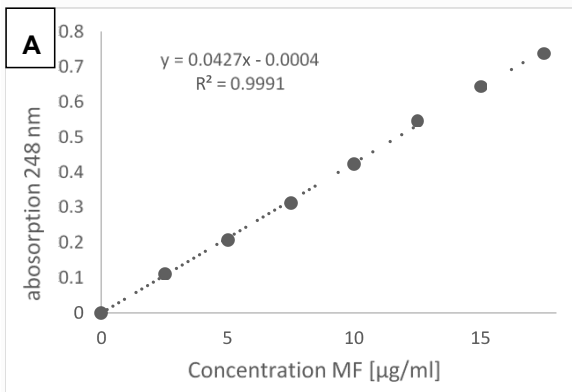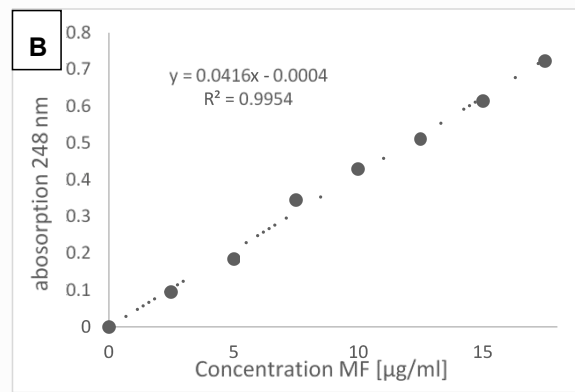

**Figure S2.** Calibration curves of MF in 1% SDS PBS solution of pH 6.4 (A) and pH 7.4 (B).

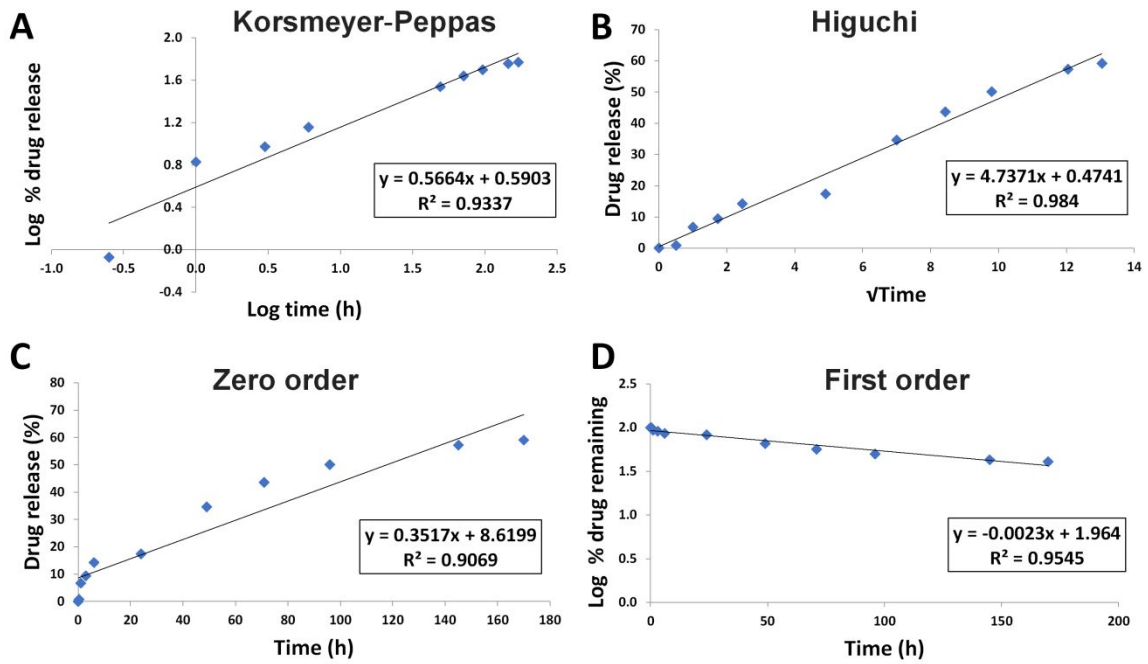

**Figure S3.** MF release from PLGA NPs after freeze-drying using 8% (w/v) sucrose at pH 7.4 fitted to kinetic models. (A) Korsmeyer-Peppas; (B) Higuchi; (C) Zero order; and (D) First order model.

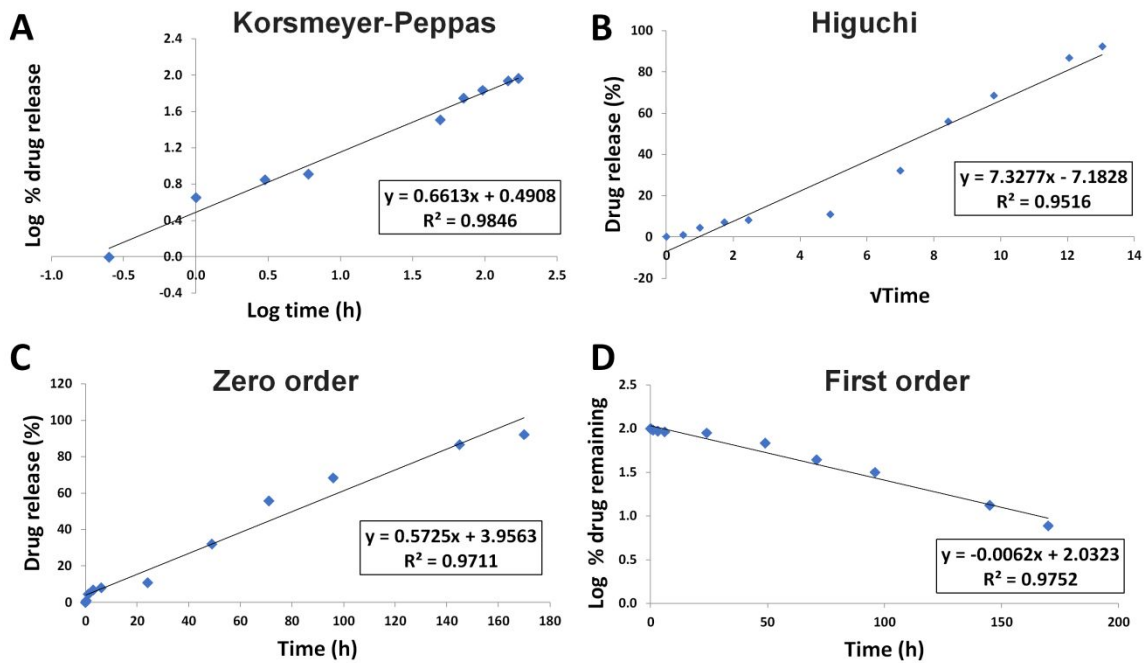

**Figure S4.** MF release from PLGA NPs after freeze-drying using 8% (w/v) sucrose at pH 6.4 fitted to kinetic models. (A) Korsmeyer-Peppas; (B) Higuchi; (C) Zero order; and (D) First order model.

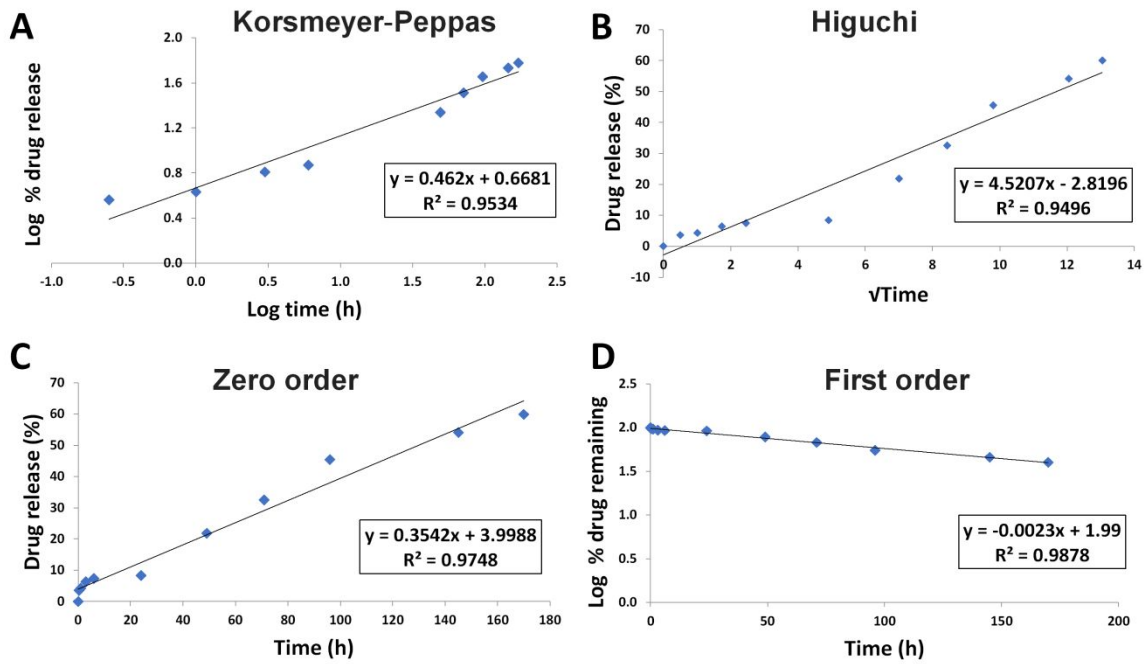

**Figure S5.** MF release from PLGA NPs after freeze-drying using 8% (w/v) mannitol at pH 7.4 fitted to kinetic models. (A) Korsmeyer-Peppas; (B) Higuchi; (C) Zero order; and (D) First order model.

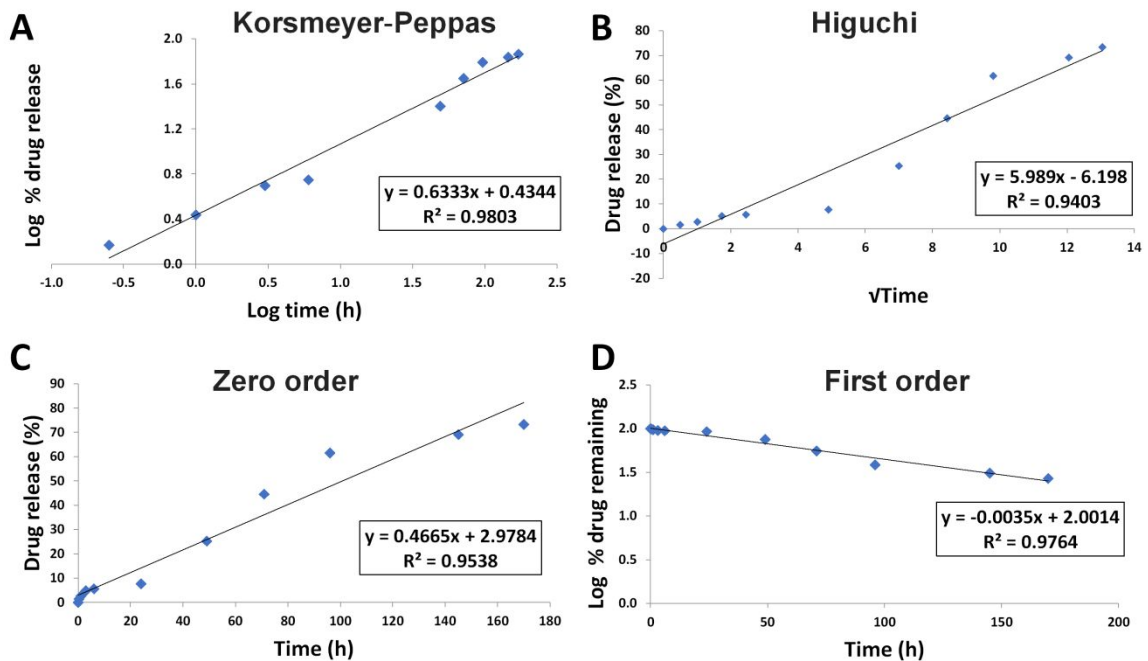

**Figure S6.** MF release from PLGA NPs after freeze-drying using 8% (w/v) mannitol at pH 6.4 fitted to kinetic models. (A) Korsmeyer-Peppas; (B) Higuchi; (C) Zero order; and (D) First order model.
